# Supplementary material for: Hierarchical Ni-Mn LDHs@CuC2O4 Nanosheet Arrays-Modified Copper Mesh: A Dual-Functional Material for Enhancing Oil/Water Separation and Supercapacitors
Source: MDPI journal article supplement (doi:10.3390/ijms241814085), 2023-09-14
Supplement: s1 [file s1]

## Supporting Information

# Hierarchical Ni-Mn LDHs@CuC<sub>2</sub>O<sub>4</sub> Nanosheet Arrays-Modified Copper Mesh: A Dual-Functional Material for Enhancing Oil/Water Separation and Supercapacitors

Yue Wu <sup>1</sup>, Guangyuan Lu <sup>1</sup>, Ping Xu <sup>1</sup>, Tian C. Zhang <sup>2</sup>, Huaqiang He <sup>1</sup> and Shaojun Yuan <sup>1,\*</sup>

<sup>1</sup> Low-Carbon Technology & Chemical Reaction Engineering Lab, College of Chemical Engineering, Sichuan University, Chengdu 610065, China; wuyue042401@163.com (Y.W.); luguangyuan\_scu@163.com (G.L.); xp001108@163.com (P.X.); hehuaqiang\_scu@163.com (H.H.)

<sup>2</sup> Civil & Environmental Engineering Department, University of Nebraska-Lincoln, Omaha, NE 68182-0178, USA; tzhang1@unl.edu

\* Correspondence: ysj@scu.edu.cn; Tel./Fax: +86-28-85405201

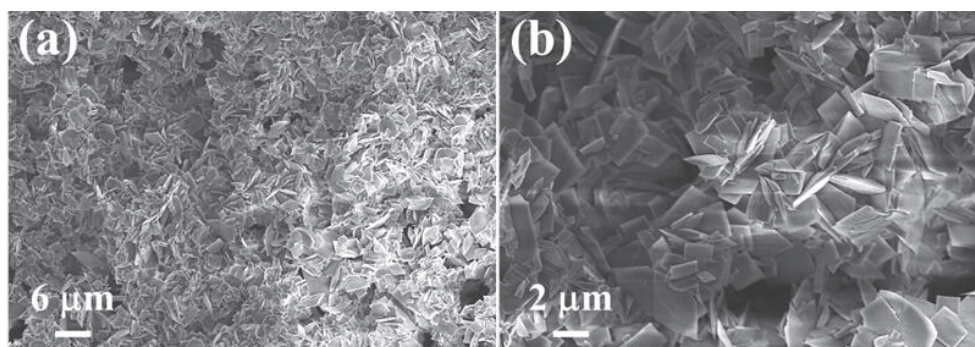

**Figure S1.** SEM images of different magnifications of CuC<sub>2</sub>O<sub>4</sub> CM. (a) 6 μm, (b) 2 μm.

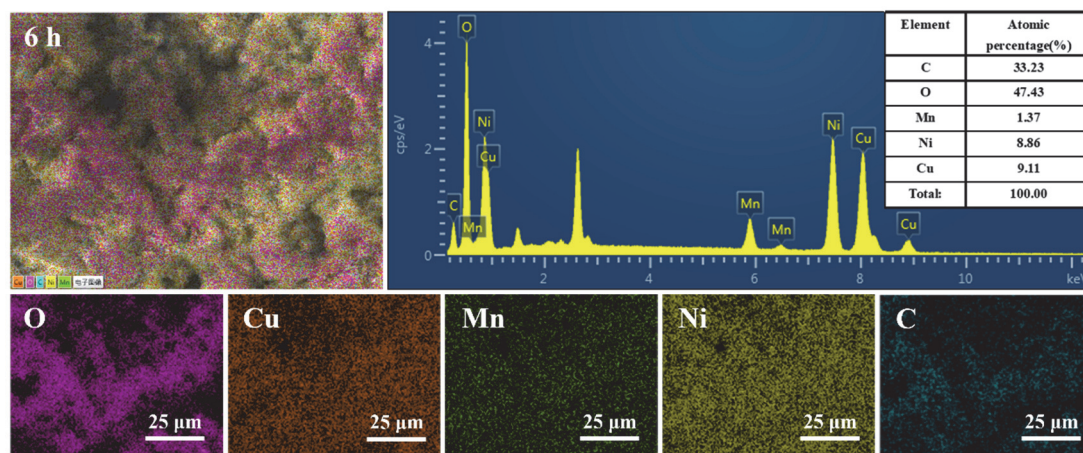

**Figure S2.** Corresponding EDS drawing and EDS mapping of Ni-Mn LDHs@CuC<sub>2</sub>O<sub>4</sub> CM after 6-h hydrothermal reaction.

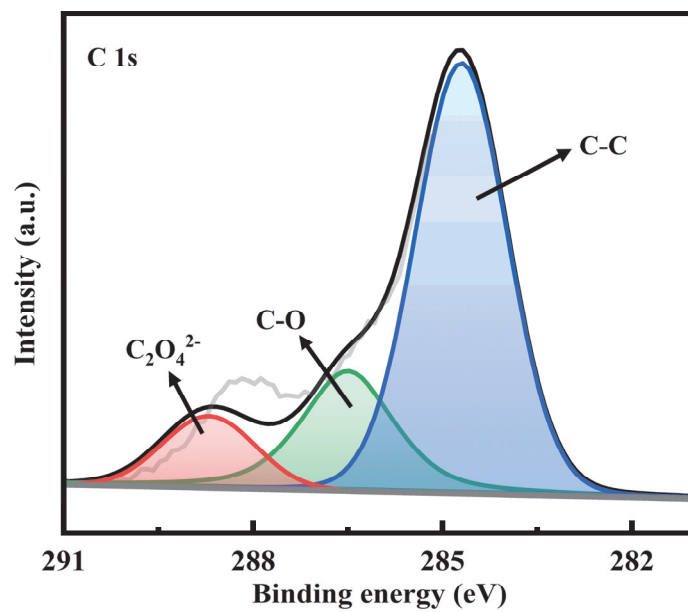

**Figure S3.** XPS spectra of C 1s of Ni-Mn LDHs@CuC<sub>2</sub>O<sub>4</sub> CM after 8-h hydrothermal reaction.

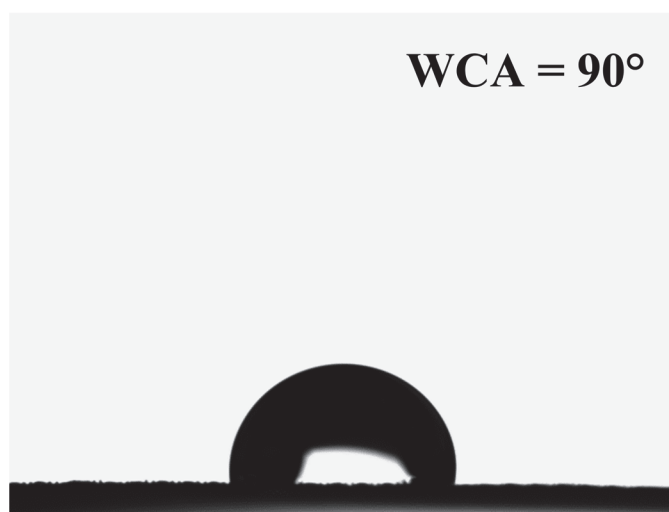

**Figure S4.** Water contact angle of original copper mesh.
